# Physiological and Biochemical Performances of Menthol-Induced Aposymbiotic Corals

Jih-Terng Wang<sup>1\*</sup>, Yi-Yun Chen<sup>1</sup>, Kwee Siong Tew<sup>2,3</sup>, Pei-Jei Meng<sup>2,3</sup>, Chaolun A. Chen<sup>4,5\*</sup>

**1** Graduate Institute of Biotechnology, Tajen University, Pingtung, Taiwan, **2** National Museum of Marine Biology and Aquarium, Pingtung, Taiwan, **3** Institute of Marine Biodiversity and Evolution, National Dong Hwa University, Pingtung, Taiwan, **4** Biodiversity Research Center and Taiwan International Graduate Program (TIGP)-Biodiversity, Academia Sinica, Taipei, Taiwan, **5** Institute of Oceanography, National Taiwan University, Taipei, Taiwan

## Abstract

The unique mutualism between corals and their photosynthetic zooxanthellae (*Symbiodinium* spp.) is the driving force behind functional assemblages of coral reefs. However, the respective roles of hosts and *Symbiodinium* in this endosymbiotic association, particularly in response to environmental challenges (e.g., high sea surface temperatures), remain unsettled. One of the key obstacles is to produce and maintain aposymbiotic coral hosts for experimental purposes. In this study, a simple and gentle protocol to generate aposymbiotic coral hosts (*Isopora palifera* and *Stylophora pistillata*) was developed using repeated incubation in menthol/artificial seawater (ASW) medium under light and in ASW in darkness, which depleted more than 99% of *Symbiodinium* from the host within 4–8 days. As indicated by the respiration rate, energy metabolism (by malate dehydrogenase activity), and nitrogen metabolism (by glutamate dehydrogenase activity and profiles of free amino acids), the physiological and biochemical performances of the menthol-induced aposymbiotic corals were comparable to their symbiotic counterparts without nutrient supplementation (e.g., for *Stylophora*) or with a nutrient supplement containing glycerol, vitamins, and a host mimic of free amino acid mixture (e.g., for *Isopora*). Differences in biochemical responses to menthol-induced bleaching between *Stylophora* and *Isopora* were attributed to the former digesting *Symbiodinium* rather than expelling the algae live as found in the latter species. Our studies showed that menthol could successfully bleach corals and provided aposymbiotic corals for further exploration of coral-alga symbioses.

**Citation:** Wang J-T, Chen Y-Y, Tew KS, Meng P-J, Chen CA (2012) Physiological and Biochemical Performances of Menthol-Induced Aposymbiotic Corals. PLoS ONE 7(9): e46406. doi:10.1371/journal.pone.0046406

**Editor:** Christian R Voolstra, King Abdullah University of Science and Technology, Saudi Arabia

**Received:** June 16, 2012; **Accepted:** August 31, 2012; **Published:** September 27, 2012

**Copyright:** © 2012 Wang et al. This is an open-access article distributed under the terms of the Creative Commons Attribution License, which permits unrestricted use, distribution, and reproduction in any medium, provided the original author and source are credited.

**Funding:** Academic Sinica Thematic grant (2008–2010) to JTW and CAC, and National Science Council (NSC-96-2628-B-001-004-MY3) to CAC. The funders had no role in study design, data collection and analysis, decision to publish, or preparation of the manuscript.

**Competing Interests:** The authors have declared that no competing interests exist.

\* E-mail: jtw@mail.tajen.edu.tw (J-TW); acropora.chen@gmail.com (CAC)

## Introduction

The unique mutualism between corals and their photosynthetic zooxanthellae (*Symbiodinium* spp.) underpins ecological success of corals in shallow and oligotrophic seawater. However, this association is highly vulnerable to rising seawater temperatures. A rise of only 1–2°C above the summer average under moderate to high irradiance will likely be enough to disrupt the symbiotic relationships by causing the symbionts to be expelled from the host, precipitating so-called ‘coral bleaching’ [1,2]. Coral bleaching events are known to further cause a breakdown [1–4] or phase shift [5–7] in coral reefs. These situations are predicted to worsen with time if the increase in seawater surface temperatures cannot be slowed [8,9].

In order to understand if corals can survive the coming stressful environments, the mechanisms underlying coral bleaching have been intensively studied (reviewed in Weis [10]). It is widely accepted that reactive oxygen species (ROS) generated by *Symbiodinium* photoinhibition and/or mitochondrial dysfunction in the host can cause breakdown of the symbiotic association [10–12]. However, the comparative susceptibility of coral hosts and *Symbiodinium* to thermal stresses is not completely understood. In studies of symbionts, cultured and freshly isolated *Symbiodinium* (FIS) was widely used to explore the symbiont physiology. Different physiological performances, such as the photosynthesis

capability under thermal stress, of FIS or cultured *Symbiodinium* were also revealed at the clade or subclade levels [13–16]. In contrast, studies on physiological responses of aposymbiotic coral hosts are limited due to a lack of suitable protocols.

Several methods were used to deplete *Symbiodinium* from cnidarian hosts, including cold shock (e.g., 4°C) [17–19], a high seawater temperature (e.g., 33°C) [20], and 3-(3,4-dichlorophenyl)-1,1-dimethylurea (DCMU) treatment [21], but few of them generated healthy aposymbiotic coral hosts which could be used for further studies. Aposymbiotic corals induced by high seawater temperatures either take a long time and need antibiotics treatment [20] or result in high coral mortality [22]. High-temperature treatment might also implant a heat experience in corals which might influence the performance of bleached corals in thermal-tolerance studies. On the other hand, bleaching corals with DCMU requires high light intensities (e.g., 70% of ambient insolation) and large volumes of seawater (ca. 1000 L) to maintain the animals, which prevents laboratories without ample seawater supplies and outdoor facilities from conducting coral-bleaching experiments. Consequently, physiological and biochemical studies on aposymbiotic hosts in *Symbiodinium*-cnidarian symbioses are mostly confined to sea anemones [19,23–26] and aposymbiotic larvae from limited coral species [27,28]. Nevertheless there are still gaps in applying the knowledge obtained from sea anemones to corals when the coral skeleton, calcification, and surface and

endoskeletal microbes should be taken into account [29]. Therefore, a general method needs to be developed to prepare as many species of aposymbiotic corals from adult individuals to conduct comparative analyses among coral species.

Menthol is a cyclic terpene alcohol which is usually used to anesthetize cnidarians in marine biological studies [30]. This compound was occasionally found to bleach *Symbiodinium*-associated corals and sea anemones during anesthetization (unpublished data). Despite menthol's toxicity to corals being unclear, menthol was found to be less toxic to an aquatic invertebrate (*Daphnia magna*) for which the 24-h 50% lethal concentration (LC<sub>50</sub>) is 37.7~71.0 mg L<sup>-1</sup> [31]. In this study, therefore, extant corals from two major lineages, respectively of robust and complex clades, were used to explore a workable procedure to prepare aposymbiotic corals from adult colonies. Furthermore, the physiological and biochemical performances of the aposymbiotic coral hosts were examined, and their comparability to their symbiotic counterparts was evaluated. Feeding an artificial diet was also used to examine the effect of exogenous nutrients on maintaining physiological and biochemical performances of aposymbiotic coral compared to their symbiotic counterparts.

## Materials and Methods

### Experimental organisms

*Isopora palifera* (robust clade) and *Stylophora pistillata* (complex clade) were respectively collected from 3 and 7 m in depth within Kenting National Park, Taiwan (21°55'54"N, 120°44'45"E) between October 2010 and November 2011. Coral colonies were transferred to the laboratory within 3 h in an aerated plastic box, and maintained in an aquarium (90×45×45 cm) equipped with illumination [12: 12-h light-dark regime and ca. 50 μmol photons m<sup>-2</sup>s<sup>-1</sup> photosynthetically active radiation (PAR)], temperature control (25°C), filtration (EHEIM, Germany), and a protein skimmer. Corals were acclimatized to laboratory conditions for 1 week before conducting the experiments.

### Bleaching coral in menthol-artificial seawater (ASW) and feeding trial

Menthol-induced coral bleaching was examined by incubating an *Isopora* fragment (ca. 5×5 cm in size) in a crystallizing dish (125×65 mm, Corning, Kaiserslautern, Germany) containing 300 ml menthol supplemented with ASW (Instant Ocean, Aquarium Systems, Sarrebourg Cedex, France) with aeration and under standard illumination as described above at 25°C. The menthol/ASW medium was prepared by diluting a 20% (w/v) menthol stock (in ethanol) with ASW and was used to bleach *Isopora* at concentrations of 0.19, 0.38, and 0.58 mM. Released *Symbiodinium* was collected by centrifuging the medium at 860×g for 3 min. The bleaching test was stopped when the coral tissue began to shrink, and the remaining *Symbiodinium* alga in *Isopora* was collected by air-blasting and centrifugation as described in a previous paper [32]. Numbers of *Symbiodinium* cells collected were counted with a Neubauer improved hemocytometer (Marienfeld Superior, Lauda-Königshofen, Germany) to determine the coral bleaching rate. Two nutrient cocktails (A and B) were used to feed bleached *Isopora* to test if nutrient supplementation was necessary to maintain the physiological and biochemical performance comparable to their symbiotic counterparts. The common supplements for nutrient A and B were 200 μg ml<sup>-1</sup> cobalamin, 4 μg ml<sup>-1</sup> biotin, and 10% glycerol. The amino acid supplement (see details in Table 1) to nutrient A was 10.5 mM of a free amino acid (FAA) mixture, an FAA pool mimic of that in the *Isopora* tissue, and that to nutrient B was a 10.5 mM so-called 'essential'

**Table 1.** Mole percentages of amino acids in the nutrient supplements for maintaining aposymbiotic *Isopora palifera*.

| Amino acid          | Free amino acid supplement (mol %) |            |
|---------------------|------------------------------------|------------|
|                     | Nutrient A                         | Nutrient B |
| Aspartate           | 4.2                                | -          |
| Glutamate           | 13.5                               | -          |
| Asparagine          | 2.0                                | -          |
| Serine              | 2.9                                | -          |
| Histidine           | 6.0                                | 10.0       |
| Glutamine           | 4.5                                | -          |
| Glycine             | 1.9                                | -          |
| Threonine           | 10.9                               | 10.0       |
| Arginine            | 5.7                                | -          |
| Taurine             | 1.4                                | -          |
| Alanine             | 4.2                                | -          |
| Tyrosine            | 10.3                               | 10.0       |
| γ-Aminobutyric acid | 2.2                                | -          |
| Tryptophane         | 0.9                                | 10.0       |
| Methionine          | 1.5                                | 10.0       |
| Valine              | 5.0                                | 10.0       |
| Phenylalanine       | 2.7                                | 10.0       |
| Isoleucine          | 3.4                                | 10.0       |
| Leucine             | 3.9                                | 10.0       |
| Lysine              | 12.8                               | 10.0       |
| Total               | 100.0                              | 100.0      |

doi:10.1371/journal.pone.0046406.t001

FAA mixture. The 10% glycerol supplement was used to provide the coral host with organic carbon and also to increase the supplement viscosity, such that the nutrient cocktail would remain on the coral surface for awhile.

### Determination of physiological and biochemical indices

The respiration rate was used to represent the general physiological performance of symbiotic and aposymbiotic coral hosts, which was determined in a custom-made respiration chamber (400 ml) which was connected with a BOD probe (YSI 5905, Yellow Springs, OH, USA) and a dissolved oxygen (DO) meter (YSI 52). Oxygen consumption by the coral host in the respiration chamber was continuously determined by connecting the meters to a personal computer for 15 min in darkness. The respiration rate of the coral host per se in symbiosis was determined by subtracting the dark respiration rate of an equivalent amount of *Symbiodinium* in the whole symbiotic consortium from the total oxygen consumption by the symbiotic coral. The dark respiration rate of *Symbiodinium* was determined with freshly isolated algae in a Hansatech Oxygraph System (Hansatech Instrument, Norfolk, UK).

Biochemical indices of the coral host were determined with the apparent activities of malate dehydrogenase (MDH) and glutamate dehydrogenase (GDH), and the FAA profile. MDH, one of the key enzymes in energy anabolism [33], was used to represent the energy-synthesizing capacity of the coral host. GDH and the composition of FAAs are two key factors which are usually used to reveal the nitrogen status of *Symbiodinium*-associated corals and sea anemone hosts [25,34]. To prepare the host homogenate, a

*Stylophora* branch of about 10 cm or an area of 25 cm<sup>2</sup> of *Isopora* was stripped of tissues with 4°C seawater buffer [25] carried by air blasting. The resulting tissue slurry stored on ice was homogenized in a syringe and then centrifuged at 21,500 ×g for 10 min (4°C) to remove cell debris and *Symbiodinium*. The enzyme extract was immediately stored at -80°C and analyzed within 3 days. MDH activity was determined by adding 100 µl of host homogenate to 1 ml of the reaction mixture containing 80 mM imidazole-HCl buffer (pH 7.0), 100 mM KCl, 0.3 mM oxaloacetate, and 0.15 mM NADH at room temperature. The activity of GDH was determined in the aminating direction, in which 100 µl of host homogenate was incubated with 1 ml of reaction mixture containing 50 mM HEPES buffer at pH 7.4, 0.2 mM NADPH, and 10 mM α-ketoglutarate at room temperature. The enzyme activity was measured by the decrease in absorbance at 340 nm, and was expressed as nmol NAD(P)<sup>+</sup> formed per milligram tissue protein per minute. Co-incubation of the host extract and reaction mixture without substrate (oxaloacetate for MDH and α-ketoglutarate for GDH) was used as a blank to confirm the specificity of the enzyme reaction, which reduced the activity by over 95%. Prior to determining FAAs in the host homogenate, samples were precipitated with 70% ethanol. FAAs in the resulting ethanol extract were quantified by a reverse-phase high-performance liquid chromatographic (HPLC) system using a pre-column derivatization method modified from Jones et al. [35]. For the HPLC analysis, the amino acids were derivatized with *o*-phthalaldehyde and separated with a solvent delivery system (Hitachi L-2130, Tokyo, Japan), using a C18-ultrasphere column and fluorescence detector (Hitachi L-2485). The reference amino acid mixture was AA-S-18 (Sigma) supplemented with asparagine, glutamine, γ-aminobutyric acid (GABA), tryptophan, and taurine. It was noted that cysteine and proline could not be detected by this technique. The protein content in the host homogenate was quantified by a protein assay kit of Bio-Rad Chemical (Hercules, CA, USA), following the manufacturer's instruction for the microassay with 0~12 µg bovine serum albumin as the standard.

### Statistical analysis

Data in this study are presented as the mean ± S.E. from numbers of different colonies. Comparisons of the host respiration rates, MDH and GDH activities, and FAA contents in the host homogenate between symbiotic and aposymbiotic coral were made using a one-way analysis of variance (ANOVA) followed by Fisher's least significance difference (LSD) test for multiple comparisons at a significance level of 0.05. For the similarity analysis of the FAA composition between symbiotic and aposymbiotic coral hosts, the mole % data of FAAs were arc cosine-transformed to meet the normality and homogeneity of variance assumptions. The similarity of the FAA compositions was compared using multidimensional scaling (MDS) ordination [36,37]. An analysis of similarity (ANOSIM) was used to determine whether FAA profiles from different treatments separated by MDS ordination significantly differed [38]. The analyses were carried out using the computer package, PRIMER 6 [38].

### Results

When *I. palifera* was incubated in menthol-supplemented ASW, the *Symbiodinium* density in the coral declined with an increase in the incubation time, and rates of algal depletion were dependent on the concentration of menthol used (Fig. 1A). In order to examine the dose response of menthol, the decline in *Symbiodinium* density with time was converted to an equation using a curve-

fitting model provided by SigmaPlot. The equation that best fit as determined by  $r^2$  values was:  $y = \frac{a}{1 + e^{\frac{-(x-x_0)}{b}}}$ . Parameters of the

equations for 0.19, 0.38, and 0.58 mM menthol treatment were:  $a = 101.22$ ,  $b = -7.37$ , and  $x_0 = 42.24$  ( $r^2 = 0.979$ );  $a = 102.08$ ,  $b = -7.08$ , and  $x_0 = 29.65$  ( $r^2 = 0.875$ ); and  $a = 104.43$ ,  $b = -3.79$ , and  $x_0 = 12.71$  ( $r^2 = 0.934$ ), respectively. Using this equation, the times for 50% coral bleaching at different menthol concentrations were estimated and regressed on the menthol concentration used. As shown in Fig. 1B, the time for 50% coral bleaching was significantly correlated with the menthol concentration used ( $p < 0.0001$ ), and the correlation was fit to the linear regression equation:  $y = 59.11 - 78.76x$  ( $r^2 = 0.983$ ). Although 0.58 mM menthol could bleach *Isopora* comparatively rapidly, continuous incubation at that concentration for 24 h always caused high (>80%) mortality. In order to obtain a rapid and gentle bleaching procedure, the duration of menthol treatment was reduced to 8 h following by 16 h of resting in an aquarium without menthol, and the mortality rate was significantly reduced in this way. With the protocol described in Fig. 2, 4 repeats of the above treatment/resting cycle could expel almost all *Symbiodinium* from *Isopora* and *Stylophora* (see as Fig. 3) within 4~8 days after being maintained in an aquarium without menthol, which resulted in respective 0% and <10% mortalities in aposymbiotic *Stylophora* and *Isopora* preparations. It was also found that *Isopora* and *Stylophora* released *Symbiodinium* in different modes during menthol treatment. *Symbiodinium* released by menthol-treated *Isopora* was in a cloudy suspension and retained some PSII activity ( $F_v/F_m = 0.3 \sim 0.5$ ), but that from menthol-treated *Stylophora* aggregated into black granules which displayed no detectable PSII activity. When coral was bleached, a nutrient cocktail was fed from day 5 for aposymbiotic *Isopora*, but aposymbiotic *Stylophora* was not fed due to its physiological and biochemical performances being comparable to its symbiotic counterpart (see below). As shown in Fig. 3, the aposymbiotic and symbiotic *Isopora* and *Stylophora* displayed comparably healthy shapes to each other.

The extents of physiological and biochemical comparability between symbiotic and aposymbiotic corals were further examined. In this study, the term, aposymbiotic host, represents freshly bleached corals which were examined at 6~10 days after menthol treatment. When comparing respiration rates, as shown in Fig. 4, those of the aposymbiotic hosts were  $12.5 \pm 1.1$  nmol min<sup>-1</sup>cm<sup>-2</sup> ( $n = 5$ ) for *Isopora* and  $9.0 \pm 1.2$  nmol min<sup>-1</sup>cm<sup>-2</sup> ( $n = 5$ ) for *Stylophora*. These data did not significantly differ from their symbiotic counterparts [ $10.3 \pm 0.5$  nmol min<sup>-1</sup>cm<sup>-2</sup> ( $n = 7$ ) for *Isopora*,  $F_{1,11} = 3.996$ ,  $p > 0.05$ ; and  $9.0 \pm 1.1$  nmol min<sup>-1</sup>cm<sup>-2</sup> ( $n = 9$ ) for *Stylophora*,  $F_{1,12} = 0.000$ ,  $p > 0.05$ ]. Feeding aposymbiotic *Isopora* and *Stylophora* with the nutrient cocktail did not produce significant differences between the symbiotic and aposymbiotic corals (data not shown).

Biochemical indices (MDH, GDH, and the FAA pool) in the host homogenate were further examined. As shown in Table 2, GDH activity, total FAAs, and "essential" FAAs in *Isopora* were significantly reduced by 50.0%, 44.7%, and 43.7%, respectively, after bleaching ( $p < 0.05$ ). However, depletion of *Symbiodinium* produced no difference in MDH activities between the symbiotic and aposymbiotic *Isopora* ( $p > 0.05$ ). "Essential" FAAs noted here followed the definition applied to the sea anemone *Aiptasia pulchella* [19]. Levels of GDH and FAAs (total and essential) in aposymbiotic *Isopora* could be reverted to comparable levels of the symbiotic counterpart by feeding with nutrient A. However, feeding with nutrient B (containing a mixture of essential FAAs) was less effective than nutrient A in reverting GDH and FAA levels back to those of the symbiotic counterpart. Total FAA

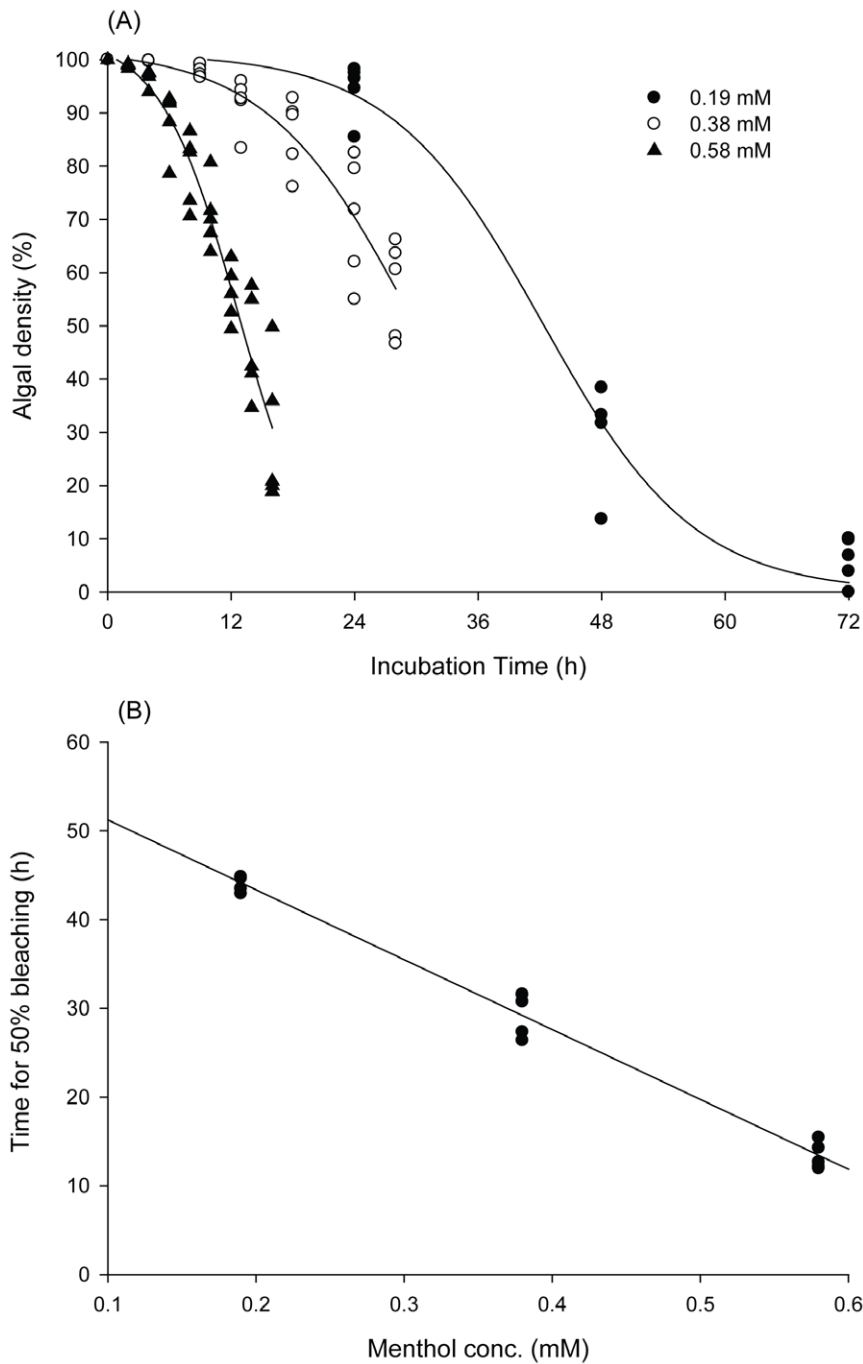

**Figure 1. Bleaching *Isopora palifera* with menthol.** (A) Decrease in the *Symbiodinium* density in treated coral with different menthol concentrations; (B) correlation between the menthol concentration and the time for 50% coral bleaching. doi:10.1371/journal.pone.0046406.g001

content in nutrient B supplemented-aposymbiotic *Isopora* reverted to about 73% of that in the symbiotic counterpart, but the value was still significantly lower ( $p < 0.01$ ) than that from the symbiotic counterpart. On the contrary, nutrient B supplementation reverted levels of GDH and essential FAAs in aposymbiotic *Isopora* to levels comparable to the symbiotic counterpart ( $p > 0.05$ ). Inconsistent with *Isopora*, levels of GDH activity, and total and essential FAAs displayed no significant ( $p > 0.05$ ) differences between symbiotic and aposymbiotic *Stylophora* (Table 3). However, as shown in Table 3, depletion of *Symbiodinium* from *Stylophora*

still caused a significant increase in host MDH activity by 49.5% ( $p < 0.005$ ). Samples from aposymbiotic *Stylophora* with feeding were not further examined because data in Table 3 suggested that feeding might not be necessary.

A comparative analysis of FAAs indicated that dominant FAAs in the host homogenate of *Isopora* were glutamate, glycine, threonine, arginine, and lysine, which comprised  $> 50$  mol% of the total detected FAAs. When *Symbiodinium* was depleted from the host, threonine was the dominant FAA in the aposymbiotic host ( $25.6 \pm 4.7$  mole%) and nutrient B-supplemented aposymbiotic

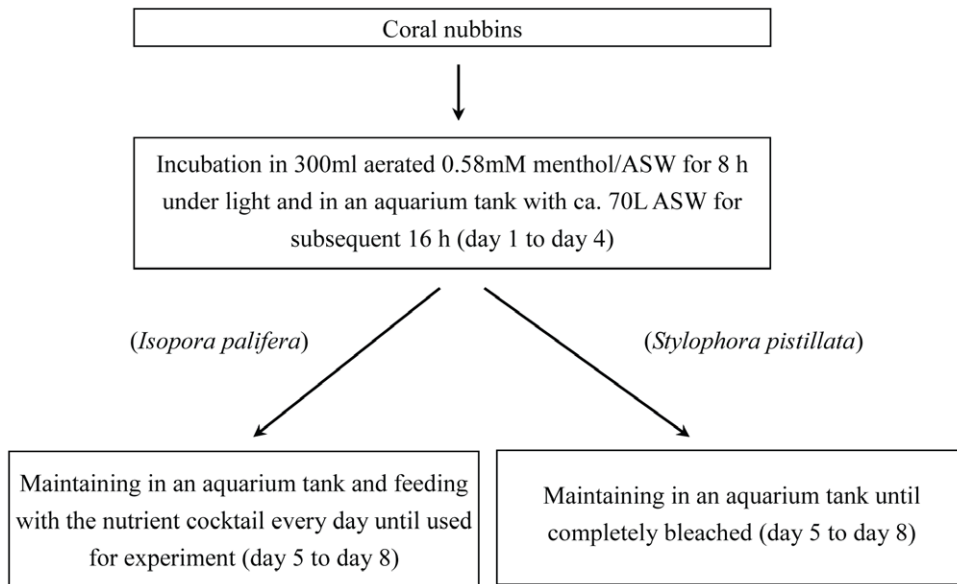

**Figure 2. Flow diagram of the preparation of aposymbiotic *Isopora palifera* and *Stylophora pistillata*.**  
doi:10.1371/journal.pone.0046406.g002

host ( $20.4 \pm 3.0$  mole%). The dominant FAA in the host homogenate of nutrient A-supplemented aposymbiotic *Isopora* was arginine ( $21.3 \pm 1.9$  mole%) instead of the amino acids mentioned above. However, the dominant FAA in the host homogenate of *Stylophora* was aspartate for both the symbiotic ( $29.5 \pm 1.4$  mole%) and aposymbiotic hosts ( $28.7 \pm 1.0$  mole%). The variance analysis of the FAA composition further indicated that FAA profiles in the host homogenate significantly differed between symbiotic and aposymbiotic *Isopora* (with or without nutrient supplementation) (ANOSIM test, global  $R=0.315$ ,  $p<0.01$ , Fig. 5A), but no

differences were found between symbiotic and aposymbiotic *Stylophora* (ANOSIM test, global  $R=0.076$ ,  $p>0.05$ , Fig. 5B). Pair-wise comparisons between different treatments in *Isopora* indicated a significant separation of FAA profiles in symbiotic coral from those in aposymbiotic coral ( $R=0.205$ ,  $p<0.01$ ) and aposymbiotic coral supplemented with nutrient B ( $R=0.466$ ,  $p<0.001$ ). However, the FAA profile in symbiotic *Isopora* could not be separated from that in the aposymbiotic counterpart supplemented with nutrient A ( $R=0.122$ ,  $p>0.05$ ).

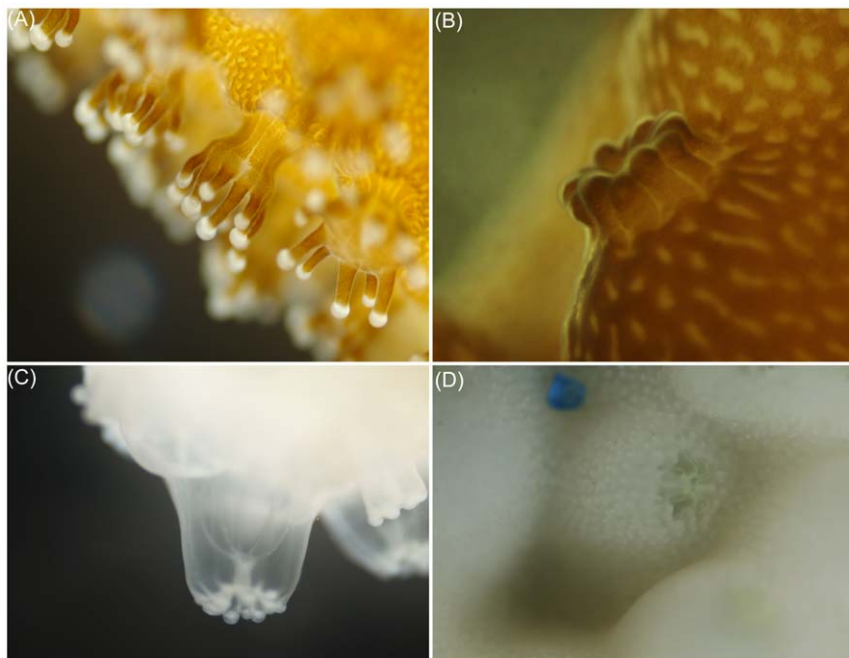

**Figure 3. Polyyps of symbiotic and aposymbiotic corals under microscopic examination.** (A) and (C) are *Stylophora pistillata*; (B) and (D) are *Isopora palifera*.  
doi:10.1371/journal.pone.0046406.g003

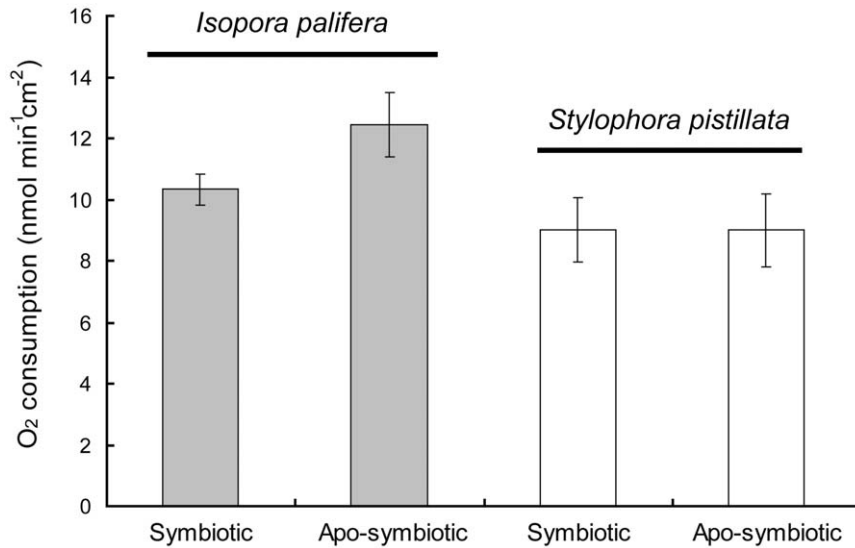

**Figure 4. Respiration rates of symbiotic and menthol-bleached *Isopora palifera* and *Stylophora pistillata*.** Aposymbiotic *I. palifera* with feeding was treated by supplementing animals with a nutrient cocktail containing glycerol, vitamins, and a host mimic free amino acid mixture as described in the [text/Table 1?]. Data represent the mean  $\pm$  S.E. doi:10.1371/journal.pone.0046406.g004

## Discussion

In this study, we applied menthol to develop a simple and gentle protocol to prepare aposymbiotic corals which retained comparable physiological and biochemical performances to their symbiotic counterparts by incubation in seawater only (for *Stylophora*) or with additional feeding of a nutrient cocktail containing glycerol, vitamins, and a host mimic FAA mixture (for *Isopora*). Bleaching coral by menthol, as indicated in Fig. 1B, occurred in a significant dose-dependent manner. However, because continuous incubation always caused high mortality, a repeated 8: 16-h menthol (treatment): ASW (resting) treatment cycle was essential for the success of the protocol (Fig. 2).

Menthol is a compound known to act on a variety of different membrane receptors, including the transient receptor potential (TRP)M8, TRPA1, and other ionotropic receptors [39]. The binding of menthol to TRPM8 results in an increase in intracellular Ca<sup>2+</sup> concentrations and causes a cold sensation in vertebrates [40–43]. Menthol was also found to cause antinoci-

ceptive and local anesthetic effects in neuronal and skeletal muscles via blocking voltage-operated sodium channels [44]. Menthol is also known to cause many adverse effects to plants, including photoinhibition [45]. In *Symbiodinium*-associated corals, the mechanism underpinning menthol-induced coral bleaching is not clear. However, based on two different *Symbiodinium*-releasing modes (ejecting the alga in a cloudy suspension by *Isopora* and releasing digested alga by *Stylophora*), the bleaching mechanism might be attributed to Ca<sup>2+</sup>-triggered exocytosis as described by Pang and Südhof [46] and/or photoinhibition in *Symbiodinium*. We have no information about Ca<sup>2+</sup> movements in the coral host during menthol treatment, but a preliminary study indicated that menthol might inhibit *Symbiodinium* photosynthesis II activity in the millimolar range (4-h IC<sub>50</sub> of 0.72~1.96 mM) which was at a similar level that caused coral bleaching (unpublished data). Further studies are needed to clarify the mechanism of menthol-induced coral bleaching.

**Table 2. Contents of free amino acids and activities of malate dehydrogenase (MDH) and glutamate dehydrogenase (GDH) in tissue homogenates of symbiotic and bleached *Isopora palifera* with or without nutrient supplementation.**

| Treatment                         | MDH                                                             | GDH                                | Free amino acids                   |                                    |
|-----------------------------------|-----------------------------------------------------------------|------------------------------------|------------------------------------|------------------------------------|
|                                   |                                                                 |                                    | Total                              | Essential                          |
|                                   | (nmole NAD(P) <sup>+</sup> min <sup>-1</sup> mg <sup>-1</sup> ) |                                    | (pmole mg <sup>-1</sup> )          |                                    |
| Symbiotic control                 | 77 $\pm$ 18 <sup>a</sup> (14)                                   | 40 $\pm$ 6 <sup>a</sup> (13)       | 385 $\pm$ 43 <sup>a</sup> (9)      | 103 $\pm$ 15 <sup>a</sup> (9)      |
| Apo-symbiotic host                | 86 $\pm$ 6 <sup>a</sup> (9)                                     | 20 $\pm$ 4 <sup>b</sup> (9)        | 213 $\pm$ 21 <sup>b</sup> (11)     | 58 $\pm$ 8 <sup>b</sup> (11)       |
| Apo-symbiotic host fed nutrient A | 109 $\pm$ 26 <sup>a</sup> (5)                                   | 24 $\pm$ 4 <sup>ab</sup> (5)       | 372 $\pm$ 29 <sup>a</sup> (5)      | 94 $\pm$ 11 <sup>a</sup> (5)       |
| Apo-symbiotic host fed nutrient B | 42 $\pm$ 9 <sup>a</sup> (11)                                    | 41 $\pm$ 5 <sup>a</sup> (8)        | 281 $\pm$ 34 <sup>b</sup> (11)     | 80 $\pm$ 8 <sup>ab</sup> (11)      |
|                                   | F <sub>3,35</sub> = 2.331 P > 0.05                              | F <sub>3,31</sub> = 3.292 P < 0.05 | F <sub>3,32</sub> = 5.864 P < 0.01 | F <sub>3,32</sub> = 3.264 P < 0.05 |

Essential amino acids followed the definition applied to the sea anemone *Aiptasia pulchella* [19]. Enzyme activities were determined as the amount of NAD(P)H (in nmol) converted to NAD(P) by 1 mg of protein in 1 min. Nutrient compositions of A and B are described in "Materials and Methods" and Table 1. Numbers in parentheses represent the number of colony replicates, and means followed by the same letter do not significantly differ at  $p = 0.05$  (Fisher's least significance difference test). Data are the mean  $\pm$  S.E.

doi:10.1371/journal.pone.0046406.t002

**Table 3.** Contents of free amino acids and activities of malate dehydrogenase (MDH) and glutamate dehydrogenase (GDH) in tissue homogenates of symbiotic and bleached *Stylophora pistillata*.

| Treatment          | MDH                                                             | GDH                              | Free amino acids                 |                                  |
|--------------------|-----------------------------------------------------------------|----------------------------------|----------------------------------|----------------------------------|
|                    |                                                                 |                                  | Total                            | Essential                        |
|                    | (nmole NAD(P) <sup>+</sup> min <sup>-1</sup> mg <sup>-1</sup> ) |                                  | (pmole mg <sup>-1</sup> )        |                                  |
| Symbiotic control  | 46±11 (12)                                                      | 21±1 (12)                        | 250±20 (12)                      | 75±12 (12)                       |
| Apo-symbiotic host | 91±6 (18)                                                       | 21±2 (20)                        | 271±11 (21)                      | 95±8 (21)                        |
|                    | F <sub>1,28</sub> = 12.948 p<0.001                              | F <sub>1,30</sub> = 0.026 p>0.05 | F <sub>1,31</sub> = 0.004 p>0.05 | F <sub>1,31</sub> = 2.231 p>0.05 |

Essential amino acids followed the definition applied to the sea anemone *Aiptasia pulchella* [19]. Enzyme activities were determined as the amount of NAD(P)H (in nmol) converted to NAD(P) by 1 mg of protein in 1 min. Numbers in parentheses represent the number of colony replicates, and data are the mean±S.E.  
doi:10.1371/journal.pone.0046406.t003

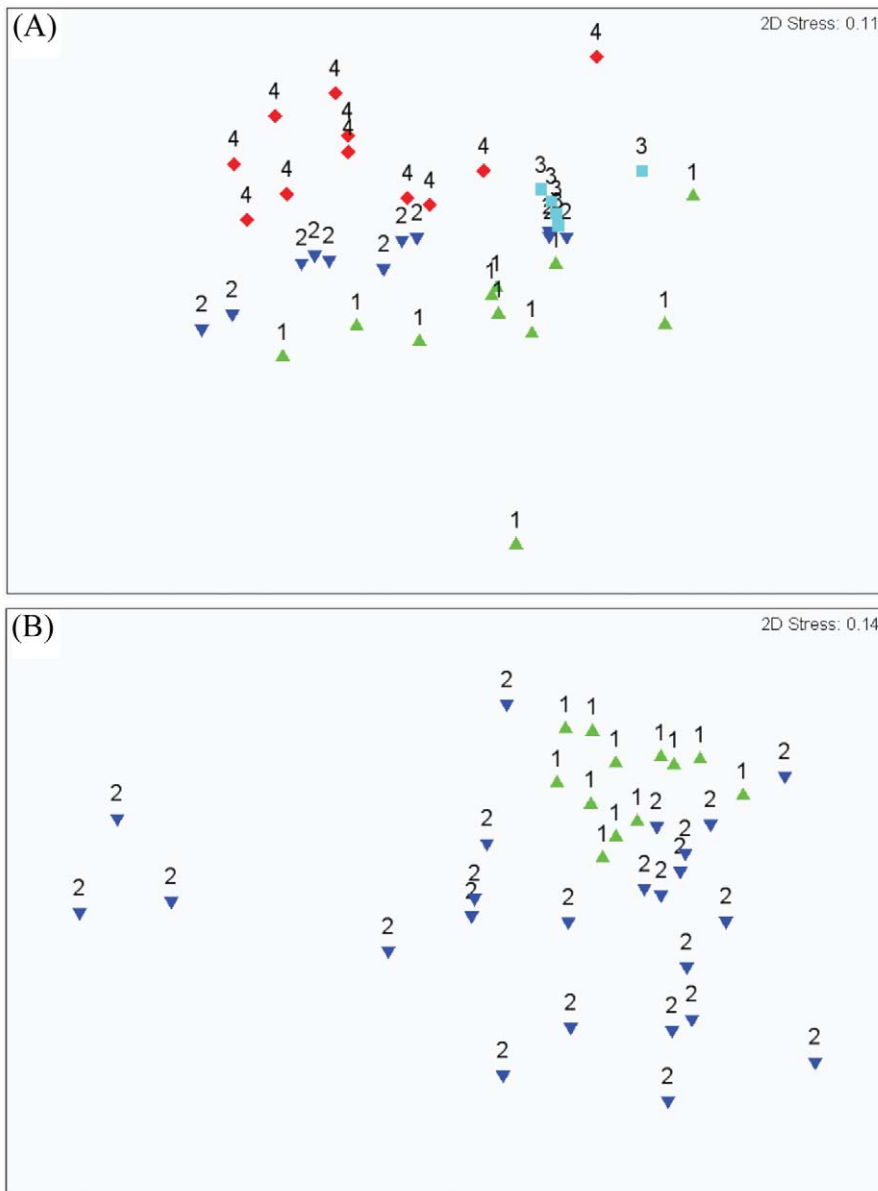

**Figure 5. Multi-dimensional scaling (MDS) ordination of arc cosine-transformed free amino acid concentrations (mole%) in tissue extracts from symbiotic, bleached, and bleached coral with nutrient supplementation. (A) *Isopora palifera* (stress = 0.11); (B) *Stylophora pistillata*. (stress = 0.14). Data labels represent the treatment for coral (1, symbiotic control; 2, bleached coral; 3, bleached coral with nutrient A supplement; 4, bleached coral with nutrient B supplement).  
doi:10.1371/journal.pone.0046406.g005**

When depleting *Symbiodinium* from a cnidarian host, a cessation in the supply of photosynthate released from the algal symbiont would greatly upset the host physiology and metabolism. Although respiration rates of some corals (*Montastraea annularis*, *Agaricia lamarcki*, *Porites compressa*, and *Montipora capitata*) decreased when *Symbiodinium* algae were depleted [47,48], those of freshly bleached *Isopora* and *Stylophora* did not significantly differ from the symbiotic counterparts (Fig. 4). No differences in respiration rates between symbiotic and aposymbiotic corals were found in the temperate coral *Astrangia danae*, which was interpreted as holozoic feeding in the aposymbiotic coral possibly compensating for the energy loss from the deprivation of photosynthate release by *Symbiodinium* [49]. Because no food sources are available in ASW, energy sources for the bleached *Stylophora* and *Isopora* to balance the loss from lack of photosynthate release by *Symbiodinium* might be derived from consuming previous reserves or digestion of impaired *Symbiodinium*.

Depletion of symbiotic algae would also result in significant changes in nitrogen metabolism of the host [25,34,50]. For example, GDH, a key enzyme for assimilating (or releasing) ammonium into (or from) amino acids, increases in alga-depleted corals and sea anemones [34]. FAAs, especially the so-called essential amino acids, in the host homogenates were also found to have decreased by nearly half after depletion of symbiotic algae [25,50]. In this study, the responses of coral nitrogen metabolism to algal depletion differed between *Stylophora* and *Isopora*. Algal depletion caused significant decreases in *Isopora* GDH activity and FAA contents but not in *Stylophora*. However, supplementation of the aposymbiotic *Isopora* with nutrients containing glycerol, a host mimic FAA mixture, and vitamins reverted the nitrogen metabolic

indices back to a level and composition comparable to the symbiotic counterpart (Table 2, Fig. 5A). This result is similar to previous findings in *Aiptasia* [25,50]. Therefore, aposymbiotic coral generated by expelling *Symbiodinium* alive during bleaching would need to be fed a proper nutrient supplement before being subjected to physiological studies. With the nutrient A supplement, we successfully maintained *Isopora* for the test of reinfection with heterogenic *Symbiodinium* (unpublished data).

In summary, comparisons of physiological performances and gene expression profiles between different species of coral hosts per se will be available by preparing freshly bleached aposymbiotic coral with the menthol protocol combined with nutrient supplementation if necessary. This technique will also potentially benefit the search for a generalist coral to re-establish symbiosis with different heterogenic *Symbiodinium*, which will make the contributions of different *Symbiodinium* subclades to coral symbiosis more straightforward.

## Acknowledgments

The authors would like to thank members of the Coral Reef Evolutionary, Ecology and Genetics (CREEG) Group, Biodiversity Research Center, Academia Sinica (BRCAS) for field support. This is CREEG-BRCAS contribution no. 83.

## Author Contributions

Conceived and designed the experiments: JW CC. Performed the experiments: JW YC. Analyzed the data: JW KT. Contributed reagents/materials/analysis tools: JW KT PM. Wrote the paper: JW CC.

## References

- Fitt WK, Brown BE, Warner ME, Dunne RP (2001) Coral bleaching: interpretation of thermal tolerance limits and thermal thresholds in tropical corals. *Coral Reefs* 20: 51–65.
- Lesser MP, Farrell JH (2004) Exposure to solar radiation increases damage to both host tissues and algal symbionts of corals during thermal stress. *Coral Reefs* 23: 367–377.
- Brown BE (1997) Coral bleaching: causes and consequences. *Coral Reefs* 16: S129–S138.
- Hoegh-Guldberg O (1999) Climate change, coral bleaching and the future of world's coral reefs. *Marine and Freshwater Research* 50: 839–866.
- Hughes TP (1994) Catastrophes, phase-shifts and large-scale degradation of Caribbean reef. *Science* 265: 1547–1551.
- Chen CA, Dai C-F (2004) Local phase shift from *Acropora*-dominant to *Condylactis*-dominant community in the Tiao-Shi Reef, Kenting National Park, southern Taiwan. *Coral Reefs* 23: 508–508.
- Hughes TP, Rodrigues MJ, Bellwood DR, Ceccarelli D, Hoegh-Guldberg O, et al. (2007) Phase shifts, herbivory, and the resilience of coral reefs to climate change. *Current Biology* 17: 360–365.
- Hoegh-Guldberg O, Mumby PJ, Hooten AJ, Steneck RS, Greenfield P, et al. (2007) Coral Reefs Under Rapid Climate Change and Ocean Acidification. *Science* 318: 1737–1742.
- Carpenter KE, Abrar M, Aeby G, Aronson RB, Banks S, et al. (2008) One-Third of Reef-Building Corals Face Elevated Extinction Risk from Climate Change and Local Impacts. *Science* 321: 560–563.
- Weis VM (2008) Cellular mechanisms of cnidarian bleaching: stress causes the collapse of symbiosis. *Journal of Experimental Biology* 211: 3059–3066.
- Downs CA, Fauth JE, Halas JC, Dustan P, Bemiss J, et al. (2002) Oxidative stress and seasonal coral bleaching. *Free Radical Biology and Medicine* 33: 533–543.
- Smith DJ, Suggett DJ, Baker NR (2005) Is Photoinhibition of zooxanthellae photosynthesis the primary cause of thermal bleaching in corals? *Global Change Biology* 11: 1–11.
- Bhagooli R, Hidaka M (2003) Comparison of stress susceptibility of in hospite and isolated zooxanthellae among five coral species. *Journal of Experimental Marine Biology and Ecology* 291: 181–197.
- Tchernov D, Gorbunov MY, Vargas Cd, Yadav SN, Milligan AJ, et al. (2004) Membrane lipids of symbiotic algae are diagnostic of sensitivity to thermal bleaching in corals. *Proceedings of the National Academy of Sciences of the United States of America* 101: 13531–13535.
- Robison JD, Warner ME (2006) Differential impacts of photoacclimation and thermal stress on the photobiology of four different phylogenotypes of *Symbiodinium* (Pyrrophyta). *Journal of Phycology* 42: 568–579.
- Wang J-T, Meng P-J, Chen Y-Y, Chen CA (2012) Determination of the thermal tolerance of *Symbiodinium* using the activation energy for inhibiting photosystem II activity. *Zoological Studies* 51: 137–142.
- Steen RG, Muscatine L (1987) Low temperature evokes rapid exocytosis of symbiotic algae by a sea anemone. *Biological Bulletin* 172: 246–263.
- Wang J-T, Douglas AE (1997) Nutrients, signals, and photosynthate release by symbiotic algae: the impact of taurine on the dinoflagellate alga *Symbiodinium* from the sea anemone *Aiptasia pulchella*. *Plant Physiology* 114: 631–636.
- Wang J-T, Douglas AE (1999) Essential amino acid synthesis and nitrogen recycling in an alga-invertebrate symbiosis. *Marine Biology* 135: 219–222.
- Coffroth MA, Poland DM, Petrou EL, Brazeau DA, Holmberg JC (2010) Environmental Symbiont Acquisition May Not Be the Solution to Warming Seas for Reef-Building Corals. *PLoS ONE* 5: e13258.
- Jones RJ (2004) Testing the 'photoinhibition' model of coral bleaching using chemical inhibitors. *Marine Ecology Progress Series* 284: 133–145.
- Berkelmans R, van Oppen MJ (2006) The role of zooxanthellae in the thermal tolerance of corals: a 'nugget of hope' for coral reefs in an era of climate change. *Proceedings of The Royal Society B* 273: 2305–2312.
- Fitt WK, Pardy RL (1981) Effects of starvation, and light and dark on the energy metabolism of symbiotic and aposymbiotic sea anemones, *Anthopleura elegantissima*. *Marine Biology* 61: 199–205.
- Weis VM, Levine RP (1996) Differential protein profiles reflect the different lifestyles of symbiotic and aposymbiotic *Anthopleura elegantissima*, a sea anemone from temperate waters. *Journal of Experimental Biology* 199: 883–892.
- Wang J-T, Douglas AE (1998) Nitrogen recycling or nitrogen conservation in an alga-invertebrate symbiosis? *Journal of Experimental Biology* 201: 2445–2453.
- Kuo J, Liang Z-C, Lin C-H (2010) Suppression subtractive hybridization identifies genes correlated to symbiotic and aposymbiotic sea anemone associated with dinoflagellate. *Journal of Experimental Marine Biology and Ecology* 388: 11–19.
- Mieog JC, Olsen JL, Berkelmans R, Bleuler-Martinez SA, Willis BL, et al. (2009) The roles and interactions of symbiont, host and environment in defining coral fitness. *PLoS ONE* 4: e6364.
- Rodriguez-Lanetty M, Harii S, Hoegh-Guldberg OVE (2009) Early molecular responses of coral larvae to hyperthermal stress. *Molecular Ecology* 18: 5101–5114.
- Weis VM, Davy SK, Hoegh-Guldberg O, Rodriguez-Lanetty M, Pringle JR (2008) Cell biology in model systems as the key to understanding corals. *Trends in Ecology & Evolution* 23: 369–376.
- Moore SJ (1989) Narcotizing sea anemones. *Journal of the Marine Biological Association of the United Kingdom* 69: 803–811.



31. OECD SIDS (2003) Menthols. CAS No: 2216-51-5, 15356-60-2, 89-78-1, 1490-04-6, United Nations Environment Programme Publications. p. 5.
32. Wang J-T, Meng P-J, Sampayo E, Tang S-L, Chen C (2011) Photosystem II breakdown induced by reactive oxygen species in freshly-isolated *Symbiodinium* from *Montipora* (Scleractinia; Acroporidae). *Marine Ecology Progress Series* 422: 51–62.
33. MacDonald MJ (1982) Evidence for the malate aspartate shuttle in pancreatic islets. *Archives of Biochemistry and Biophysics* 213: 643–649.
34. Rahav O, Dubinsky Z, Aचितув Y, Falkowski PG (1989) Ammonium metabolism in the zooxanthellate Coral, *Stylophora pistillata*. *Proceedings of the Royal Society of London Series B* 236: 325–337.
35. Jones BN, Pääbo S., Stein S. (1981) Amino acid analysis and enzymatic sequence determination of peptides by an improved o-phthalaldehyde precolumn labeling procedure. *Journal Liquid Chromatography* 4: 565–586.
36. González-Teuber M, Heil M (2009) The role of extrafloral nectar amino acids for the preferences of facultative and obligate ant mutualists. *Journal of Chemical Ecology* 35: 459–468.
37. Kruskal JB, Wish M (1978) Multidimensional scaling.
38. Clarke KR, Warwick RM (1994) Changes in marine communities: an approach to statistical analysis and interpretation.
39. Hans M, Wilhelm M, Swandulla D (2012) Menthol suppresses nicotinic acetylcholine receptor functioning in sensory neurons via allosteric modulation. *Chemical Senses* 37: 463–469.
40. Okazawa M, Terauchi T, Shiraki T, Matsumura K, Kobayashi S (2000) 1-Menthol-induced  $[Ca^{2+}]_i$  increase and impulses in cultured sensory neurons. *Neuroreport* 11: 2151–2155.
41. McKemy DD, Neuhauser WM, Julius D (2002) Identification of a cold receptor reveals a general role for TRP channels in thermosensation. *Nature* 416: 52–58.
42. Peier AM, Moqrich A, Hergarden AC, Reeve AJ, Andersson DA, et al. (2002) A TRP channel that senses cold stimuli and menthol. *Cell* 108: 705–715.
43. Reid G, Babes A, Pluteanu F (2002) A cold- and menthol-activated current in rat dorsal root ganglion neurones: properties and role in cold transduction. *The Journal of Physiology* 545: 595–614.
44. Haeseler G, Maue D, Grosskreutz J, Bufler J, Nentwig B, et al. (2002) Voltage-dependent block of neuronal and skeletal muscle sodium channels by thymol and menthol. *European Journal of Anaesthesiology* 19: 571–579.
45. Brown JT, Hegarty PK, Charlwood BV (1987) The Toxicity of monoterpenes to plant cell cultures. *Plant Science* 48: 195–201.
46. Pang ZP, Südhof TC (2010) Cell biology of  $Ca^{2+}$ -triggered exocytosis. *Current Opinion in Cell Biology* 22: 496–505.
47. Rodrigues LJ, Grotto AA (2007) Energy reserves and metabolism as indicators of coral recovery from bleaching. *Limnology Oceanography* 52: 1874–1882.
48. Porter JW, Fitt WK, Spero HJ, Rogers CS, White MW (1989) Bleaching in reef corals: Physiological and stable isotopic responses. *Proceedings of the National Academy of Sciences* 86: 9342–9346.
49. Szmant-Froelich A, Pilson ME (1984) Effects of feeding frequency and symbiosis with zooxanthellae on nitrogen metabolism and respiration of the coral *Astrangia danae*. *Marine Biology (Berlin)* 81: 153–162.
50. Rees TAV (1986) The Green Hydra Symbiosis and Ammonium I. The Role of the Host in Ammonium Assimilation and its Possible Regulatory Significance. *Proceedings of the Royal Society of London Series B Biological Sciences* 229: 299–314.
